# Supplementary material
Source: PubMed Central journal article supplement (PMC2646459)
Supplement: 00035.2008_1.pdf [file 00035.2008_1.pdf]

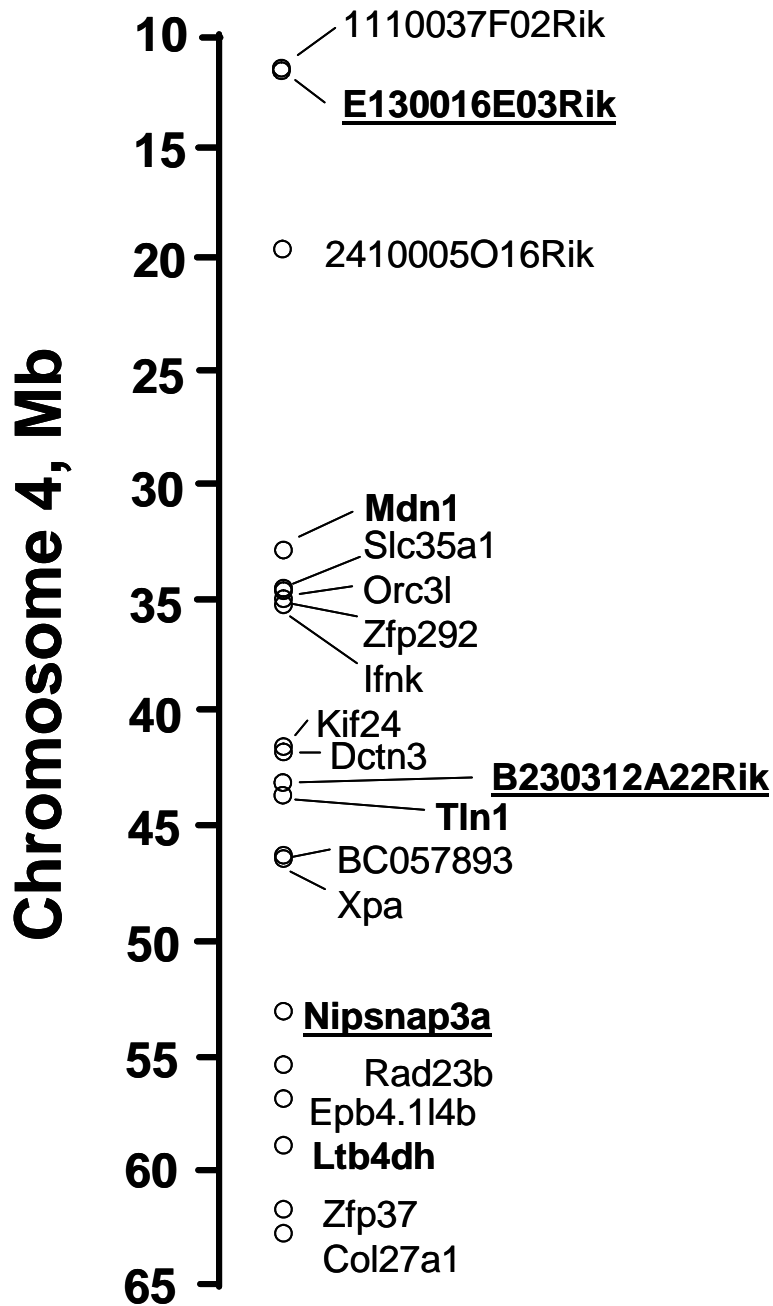

Supplemental Figure 1. Genes with non-synonymous SNPs in the Bpq10 locus. Bolded and underlined genes were predicted to have a probably damaging effect, bolded genes, a *possibly damaging* effect, by PolyPhen analysis. Polymorphisms for the remaining genes were predicted to be *benign*.
